# Supplementary material for: A Murine Skin Infection Model Capable of Differentiating the Dermatopathology of Community-Associated MRSA Strain USA300 from Other MRSA Strains
Source: MDPI journal article supplement (doi:10.3390/microorganisms9020287), 2021-01-30
Supplement: s1 [file s1]

**Supplementary Table 1.** List of transcription levels for host genes related to the antibacterial response, for mice infected with USA300, USA400 and M92 MRSA strains (Day 4).

|                                           | Comparison with Saline control                        |                                                        |                                          | Comparison between strains                                       |                                                    |                                                      |
|-------------------------------------------|-------------------------------------------------------|--------------------------------------------------------|------------------------------------------|------------------------------------------------------------------|----------------------------------------------------|------------------------------------------------------|
|                                           | USA300-<br>C2406 vs<br>Saline<br>(fold<br>regulation) | USA400-<br>CMRSA7<br>vs Saline<br>(fold<br>regulation) | M92 vs<br>Saline<br>(fold<br>regulation) | USA300-<br>C2406 vs<br>USA400-<br>CMRSA7<br>(fold<br>regulation) | USA300-<br>C2406 vs<br>M92<br>(fold<br>regulation) | USA4000-<br>CMRSA7<br>vs M92<br>(fold<br>regulation) |
| <b>Toll-Like Receptor (TLR) Signaling</b> |                                                       |                                                        |                                          |                                                                  |                                                    |                                                      |
| Akt1                                      | -                                                     | 5.17                                                   | 2.39                                     | -4.49                                                            | -2.07                                              | 2.17                                                 |
| Casp8                                     | 3.13 **                                               | 2.78                                                   | 3.26 *                                   | -                                                                | -                                                  | -                                                    |
| Cd14                                      | 53.3 *                                                | 50.71                                                  | 74.14                                    | -                                                                | -                                                  | -                                                    |
| Fadd                                      | -                                                     | -                                                      | -                                        | -                                                                | -2.07                                              | -                                                    |
| Irak1                                     | -                                                     | -                                                      | -                                        | -                                                                | -                                                  | -                                                    |
| Irak3                                     | -                                                     | 3.12                                                   | 2.61 *                                   | -2.43                                                            | -2.03 *                                            | -                                                    |
| Irf5                                      | -                                                     | 2.22                                                   | -                                        | -3.38                                                            | -                                                  | 2.28                                                 |
| Irf7                                      | 5.16 *                                                | 6.46                                                   | 8.2                                      | -                                                                | -                                                  | -                                                    |
| Lbp                                       | 12.32 **                                              | 3.72 *                                                 | 5.44 *                                   | 3.31 *                                                           | 2.26 *                                             | -                                                    |
| Ly96                                      | 3.42                                                  | 2.47                                                   | 3.96                                     | -                                                                | -                                                  | -                                                    |
| Map3k7                                    | -                                                     | -                                                      | -                                        | -                                                                | -                                                  | -                                                    |
| Myd88                                     | -                                                     | 2.53                                                   | 2.81                                     | -                                                                | -                                                  | -                                                    |
| Pik3ca                                    | -                                                     | -                                                      | -                                        | -                                                                | -                                                  | -                                                    |
| Pstpip1                                   | 5.82 **                                               | 4.99                                                   | 6.23                                     | -                                                                | -                                                  | -                                                    |
| Rac1                                      | -                                                     | -                                                      | -                                        | -                                                                | -                                                  | -                                                    |
| Ripk1                                     | -                                                     | -                                                      | -                                        | -                                                                | -                                                  | -                                                    |
| Ticam1                                    | -                                                     | -                                                      | -                                        | -                                                                | -                                                  | -                                                    |
| Ticam2                                    | 4.63                                                  | 6.04 ***                                               | 4.17                                     | -                                                                | -                                                  | -                                                    |
| Tirap                                     | -                                                     | -                                                      | -                                        | -                                                                | -                                                  | -                                                    |
| Tlr1                                      | 22.63 **                                              | 14.37                                                  | 24.33                                    | -                                                                | -                                                  | -                                                    |
| Tlr2                                      | 6.75 *                                                | 7.49                                                   | 9.56                                     | -                                                                | -                                                  | -                                                    |
| Tlr4                                      | 7.46 *                                                | 5.78                                                   | 4.88                                     | -                                                                | -                                                  | -                                                    |
| Tlr5                                      | -                                                     | -                                                      | -                                        | -                                                                | -                                                  | -                                                    |
| Tlr6                                      | 4.17 *                                                | 11.43                                                  | 3.83                                     | -2.74                                                            | -                                                  | 2.98                                                 |
| Tlr9                                      | 2.07                                                  | 6.75                                                   | 5.29                                     | -3.26                                                            | -2.56                                              | -                                                    |
| Tollip                                    | -2.3 *                                                | -                                                      | -                                        | -2.69 *                                                          | -                                                  | -                                                    |
| Traf6                                     | -                                                     | -                                                      | -                                        | -                                                                | -                                                  | -                                                    |
| <b>NOD-Like Receptor (NLR) Signaling</b>  |                                                       |                                                        |                                          |                                                                  |                                                    |                                                      |
| Birc3                                     | 2.52 **                                               | 4.71                                                   | 3.89 *                                   | -                                                                | -                                                  | -                                                    |
| Card6                                     | 2.65 *                                                | 5.33                                                   | 3.92                                     | -2.01                                                            | -                                                  | -                                                    |
| Card9                                     | 3.83                                                  | 5.35                                                   | 4.68                                     | -                                                                | -                                                  | -                                                    |
| Casp1                                     | 2.04                                                  | 3.03                                                   | 4.21                                     | -                                                                | -2.06                                              | -                                                    |
| Casp8                                     | 3.13 **                                               | 2.78                                                   | 3.26 *                                   | -                                                                | -                                                  | -                                                    |
| Hsp90aa1                                  | 3.27                                                  | 2.54                                                   | 2.26                                     | -                                                                | -                                                  | -                                                    |
| Mefv                                      | 9.11 *                                                | 14.07                                                  | 7                                        | -                                                                | -                                                  | 2.01                                                 |
| Naip1                                     | -                                                     | 5.17                                                   | 2.39                                     | -3.81                                                            | -                                                  | 2.17                                                 |
| Nlrc4                                     | 2.71                                                  | 5.17                                                   | 3.27                                     | -                                                                | -                                                  | -                                                    |
| Nlrp1a                                    | -                                                     | 7.54                                                   | 2.25                                     | -6.41                                                            | -                                                  | 3.36                                                 |
| Nlrp3                                     | 39                                                    | 48.98                                                  | 48.21                                    | -                                                                | -                                                  | -                                                    |
| Nod1                                      | -                                                     | -                                                      | -                                        | -                                                                | -                                                  | -                                                    |

|                                                             |           |        |        |         |          |        |
|-------------------------------------------------------------|-----------|--------|--------|---------|----------|--------|
| Nod2                                                        | -         | 3.11   | -      | -2.21   | -        | -      |
| Pycard                                                      | -         | -      | -      | -       | -2.92    | -      |
| Ripk2                                                       | -         | -      | -      | -       | -2.32 ** | -      |
| Sugt1                                                       | -         | -      | -      | -       | -        | -      |
| Tnf                                                         | 23.03 *   | 19.44  | 20.61  | -       | -        | -      |
| Xiap                                                        | -         | -      | 2.2    | -       | -        | -      |
| <b>Other Bacterial Pattern Recognition Receptors (PRRs)</b> |           |        |        |         |          |        |
| Apcs                                                        | 6.36      | 5.17   | 5.17   | -       | 2.67     | 2.17   |
| Crp                                                         | 4.63      | 5.17   | 5.17   | -       | -        | 2.17   |
| Dmbt1                                                       | -         | 5.17   | 5.17   | -4.49   | -        | 2.17   |
| Zbp1                                                        | 7.04 **   | 5.16   | 5.16   | -       | -        | -2.48  |
| <b>Signaling Downstream of Antibacterial Responses</b>      |           |        |        |         |          |        |
| Chuk                                                        | -         | -      | -      | -       | -        | -      |
| Ikbkb                                                       | -         | -      | -      | -       | -        | -      |
| Jun                                                         | -         | -      | -      | -       | -        | 2.27 * |
| Map2k1                                                      | -         | -      | -      | -       | -        | -      |
| Map2k3                                                      | -3.55 *** | -      | -2.68  | -2.08 * | -        | -      |
| Map2k4                                                      | -         | -      | -      | -       | -        | -      |
| Mapk1                                                       | -         | -      | -      | -       | -        | -      |
| Mapk14                                                      | -         | -      | -      | -       | -        | -      |
| Mapk3                                                       | -         | -      | -      | -2.13 * | -        | -      |
| Mapk8                                                       | -         | -      | -      | -       | -        | -      |
| Nfkb1                                                       | -         | -      | -      | -       | -        | -      |
| Nfkbia                                                      | -         | 4.09   | 2.72 * | -2.12   | -        | -      |
| Rela                                                        | -         | -      | -      | -       | -        | -      |
| Tnfrsf1a                                                    | -         | -      | -      | -       | -        | -      |
| <b>Apoptosis</b>                                            |           |        |        |         |          |        |
| Akt1                                                        | -         | 5.17   | 2.39   | -4.49   | -2.07    | 2.17   |
| Birc3                                                       | 2.52 **   | 4.71   | 3.89 * | -       | -        | -      |
| Card6                                                       | 2.65 *    | 5.33   | 3.92   | -2.01   | -        | -      |
| Card9                                                       | 3.83      | 5.35   | 4.68   | -       | -        | -      |
| Casp1                                                       | 2.04      | 3.03   | 4.21   | -       | -2.06    | -      |
| Casp8                                                       | 3.13 **   | 2.78   | 3.26 * | -       | -        | -      |
| Cd14                                                        | 53.3 *    | 50.71  | 74.14  | -       | -        | -      |
| Fadd                                                        | -         | -      | -      | -       | -2.07    | -      |
| Ifnb1                                                       | -         | 5.17   | 2.39   | -4.49   | -2.07    | 2.17   |
| Ikbkb                                                       | -         | -      | -      | -       | -        | -      |
| Il12a                                                       | -         | -      | -      | -3.2    | -        | -      |
| Il12b                                                       | -         | 6.72   | 3.08   | -5.83   | -2.68    | 2.18   |
| Il1b                                                        | 420.87 *  | 553.19 | 697.25 | -       | -        | -      |
| Il6                                                         | 3.32      | 5.17   | 6.81   | -       | -2.05    | -      |
| Irak1                                                       | -         | -      | -      | -       | -        | -      |
| Jun                                                         | -         | -      | -      | -       | -        | 2.27 * |
| Map3k7                                                      | -         | -      | -      | -       | -        | -      |
| Mapk1                                                       | -         | -      | -      | -       | -        | -      |
| Mapk8                                                       | -         | -      | -      | -       | -        | -      |
| Mpo                                                         | -         | 2.27   | -      | -       | -        | -      |
| Nfkb1                                                       | -         | -      | -      | -       | -        | -      |
| Nfkbia                                                      | -         | 4.09   | 2.72 * | -2.12   | -        | -      |
| Pik3ca                                                      | -         | -      | -      | -       | -        | -      |

|                                   |           |          |        |         |          |       |
|-----------------------------------|-----------|----------|--------|---------|----------|-------|
| Pycard                            | -         | -        | -      | -       | -2.92    | -     |
| Rac1                              | -         | -        | -      | -       | -        | -     |
| Ripk1                             | -         | -        | -      | -       | -        | -     |
| Ripk2                             | -         | -        | -      | -       | -2.32 ** | -     |
| Tnf                               | 23.03 *   | 19.44    | 20.61  | -       | -        | -     |
| Tnfrsf1a                          | -         | -        | -      | -       | -        | -     |
| Traf6                             | -         | -        | -      | -       | -        | -     |
| <b>Inflammatory Response</b>      |           |          |        |         |          |       |
| Akt1                              | -         | 5.17     | 2.39   | -4.49   | -2.07    | 2.17  |
| Apcs                              | 6.36      | 5.17     | 2.39   | -       | 2.67     | 2.17  |
| Ccl3                              | 494.23 *  | 512.99   | 251.09 | -       | -        | 2.04  |
| Ccl5                              | 7.88 *    | 13.59    | 34.57  | -       | -4.39    | -2.54 |
| Cd14                              | 53.3 *    | 50.71    | 74.14  | -       | -        | -     |
| Crp                               | 4.63      | 5.17     | 2.39   | -       | -        | 2.17  |
| Cxcl1                             | 40.56 *** | 18.23    | 15.9   | 2.23    | 2.55     | -     |
| Cxcl3                             | 284.86    | 389.05   | 181.64 | -       | -2.07    | 2.14  |
| Il1b                              | 420.87 *  | 553.19   | 697.25 | -       | -        | -     |
| Il6                               | 3.32      | 5.17     | 6.81   | -       | -2.05    | -     |
| Lbp                               | 12.32 **  | 3.72 *   | 5.44 * | 3.31 *  | 2.26 *   | -     |
| Ly96                              | 3.42      | 2.47     | 3.96   | -       | -        | -     |
| Lyz2                              | 6.15 ***  | 6        | 9.71   | -       | -        | -     |
| Mefv                              | 9.11 *    | 14.07    | 7      | -       | -        | 2.01  |
| Myd88                             | -         | 2.53     | 2.81   | -       | -        | -     |
| Nfkb1                             | -         | -        | -      | -       | -        | -     |
| Nlrc4                             | 2.71      | 5.17     | 3.27   | -       | -        | -     |
| Nlrp3                             | 39        | 48.98    | 48.21  | -       | -        | -     |
| Nod1                              | -         | -        | -      | -       | -        | -     |
| Rac1                              | -         | -        | -      | -       | -        | -     |
| Rela                              | -         | -        | -      | -       | -        | -     |
| Ripk2                             | -         | -        | -      | -       | -2.32 ** | -     |
| Slc11a1                           | 15.39     | 18.89    | 17.15  | -       | -        | -     |
| Ticam2                            | 4.63      | 6.04 *** | 4.17   | -       | -        | -     |
| Tirap                             | -         | -        | -      | -       | -        | -     |
| Tlr1                              | 22.63 **  | 14.37    | 24.33  | -       | -        | -     |
| Tlr2                              | 6.75 *    | 7.49     | 9.56   | -       | -        | -     |
| Tlr4                              | 7.46 *    | 5.78     | 4.88   | -       | -        | -     |
| Tlr5                              | -         | -        | -      | -       | -        | -     |
| Tlr6                              | 4.17 *    | 11.43    | 3.83   | -2.74   | -        | 2.98  |
| Tlr9                              | 2.07      | 6.75     | 5.29   | -3.26   | -2.56    | -     |
| Tnf                               | 23.03 *   | 19.44    | 20.61  | -       | -        | -     |
| Tnfrsf1a                          | -         | -        | -      | -       | -        | -     |
| Tollip                            | -2.3 *    | -        | -      | -2.69 * | -        | -     |
| <b>Cytokines &amp; Chemokines</b> |           |          |        |         |          |       |
| Ccl3                              | 494.23 *  | 512.99   | 251.09 | -       | -        | 2.04  |
| Ccl4                              | 147.75 *  | 244.17   | 101.82 | -       | -        | 2.4   |
| Ccl5                              | 7.88 *    | 13.59    | 34.57  | -       | -4.39    | -2.54 |
| Cxcl1                             | 40.56 *** | 18.23    | 15.9   | 2.23    | 2.55     | -     |
| Cxcl3                             | 284.86    | 389.05   | 181.64 | -       | -2.07    | 2.14  |
| Ifna9                             | -         | 5.17     | 2.39   | -4.49   | -2.07    | 2.17  |
| Ifnb1                             | -         | 5.17     | 2.39   | -4.49   | -2.07    | 2.17  |
| Il12a                             | -         | -        | -      | -3.2    | -        | -     |

|       |          |        |        |         |         |      |
|-------|----------|--------|--------|---------|---------|------|
| Il12b | -        | 6.72   | 3.08   | -5.83   | -2.68   | 2.18 |
| Il18  | -2.69 *  | -      | -      | -3.22 * | -3.39 * | -    |
| Il1b  | 420.87 * | 553.19 | 697.25 | -       | -       | -    |
| Il6   | 3.32     | 5.17   | 6.81   | -       | -2.05   | -    |

---

#### Antimicrobial Peptides

|       |           |        |         |       |       |      |
|-------|-----------|--------|---------|-------|-------|------|
| Bpi   | -         | 5.17   | 2.39    | -4.49 | -2.07 | 2.17 |
| Camp  | 2.77      | 6.63   | 2.39    | -2.4  | -     | 2.78 |
| Ctsg  | -         | 5.17   | 2.39    | -4.05 | -     | 2.17 |
| Lcn2  | 178.32 ** | 115.53 | 71.33 * | -     | 2.5   | -    |
| Ltf   | 2.98      | 10.74  | 4.93    | -3.61 | -     | 2.18 |
| Lyz2  | 6.15 ***  | 6      | 9.71    | -     | -     | -    |
| Mpo   | -         | 2.27   | -       | -     | -     | -    |
| Prtn3 | -         | 5.17   | 2.39    | -3.79 | -     | 2.17 |
| Slpi  | 218.77 *  | 59.32  | 86.65   | 3.69  | 2.52  | -    |

---

Note: Tested using Qiagen mouse antibacterial response PCR array. Targets are listed for each host response and some may be present in more than one group. -, transcriptional fold change was less than 2; \*p<0.05; \*\*p<0.01; \*\*\*, p<0.001. A negative fold change is highlighted grey.

**Supplementary Table 2.** Cytokine and Chemokine profiles for mice on days 7 post infection with M92, USA400 and USA300 MRSA strains.

| Role                                                                   | Cytokine/<br>Chemokine | Saline conc.                 | M92<br>conc.                    | USA400-<br>CMRSA7<br>conc.       | USA300-C2406                    |            |            |                       |
|------------------------------------------------------------------------|------------------------|------------------------------|---------------------------------|----------------------------------|---------------------------------|------------|------------|-----------------------|
|                                                                        |                        |                              |                                 |                                  | USA300-C2406<br>conc.           | vs. Saline | vs.<br>M92 | vs. USA400-<br>CMRSA7 |
| Protection                                                             | IL-17A                 | 0.0064<br>(0.0000-0.0065)    | 5.8311<br>(2.7381-9.6017)       | 2.6865<br>(0.3306-7.4144)        | 6.8417<br>(1.1541-22.2026)      |            |            |                       |
|                                                                        | IL-1a                  | 27.8669<br>(16.5961-37.7149) | 23.9215<br>(10.6024-33.7854)    | 16.6723<br>(9.6481-30.9802)      | 24.974<br>(14.5240-35.9588)     |            |            |                       |
|                                                                        | IL-1b                  | 0.3361<br>(0.1769-0.5097)    | 2.2705<br>(0.4712-3.6375)       | 5.4559<br>(0.7044-10.4625)       | 3.4462<br>(2.6744-4.0097)       |            |            |                       |
| Severity                                                               | IL-4                   | 0.0076<br>(0.0025-0.0133)    | 0.0187<br>(0.0094-0.0275)       | 0.026<br>(0.0075-0.0406)         | 0.0434<br>(0.0218-0.0790)       | *          |            |                       |
|                                                                        | IL-6                   | 0.006<br>(0.0000-0.0115)     | 0.3748<br>(0.0204-1.3718)       | 0.9438<br>(0.0153-2.0750)        | 2.473<br>(0.3275-3.4872)        | *          | *          |                       |
|                                                                        | IFN $\gamma$           | 0.000<br>(0.0000-0.0000)     | 0.0806<br>(0.0000-0.1983)       | 0.0888<br>(0.0000-0.2734)        | 0.082<br>(0.0128-0.1413)        |            |            |                       |
|                                                                        | TNFa                   | 0.0129<br>(0.0000-0.0327)    | 0.3213<br>(0.1059-0.5318)       | 0.5811<br>(0.1456-0.9594)        | 0.7073<br>(0.4138-1.0201)       |            |            |                       |
|                                                                        | GM-CSF                 | 0.1813<br>(0.0000-0.4786)    | 0.6594<br>(0.1814-0.9258)       | 1.7784<br>(0.3983-5.2089)        | 1.1752<br>(0.9162-1.5529)       |            |            |                       |
|                                                                        | G-CSF                  | 0.063<br>(0.0000-0.2607)     | 20.8058<br>(7.8732-50.6940)     | 16.1263<br>(1.9153-29.0040)      | 101.1745<br>(51.4449-156.3516)  | **         | *          | *                     |
|                                                                        | M-CSF                  | 0.0504<br>(0.0337-0.0848)    | 0.1659<br>(0.0596-0.2600)       | 3.0254<br>(0.5272-11.3227)       | 6.2339<br>(1.4453-13.5583)      |            |            |                       |
|                                                                        | KC                     | 1.7457<br>(0.6750-3.0163)    | 16.1875<br>(10.8424-25.7155)    | 22.6019<br>(5.2889-34.9305)      | 34.5549<br>(24.9047-39.7983)    | **         |            |                       |
|                                                                        | MIP-2                  | 0.5972<br>(0.4312-0.8887)    | 242.2743<br>(102.5125-382.2458) | 363.2926**<br>(48.8692-773.4953) | 304.0403<br>(180.8457-367.8683) | *          |            |                       |
|                                                                        | IL-12(p70)             | 0.0503<br>(0.0178-0.0613)    | 0.1486<br>(0.0680-0.3024)       | 0.2452<br>(0.0517-0.5429)        | 0.2442<br>(0.1419-0.3256)       |            |            |                       |
|                                                                        | IL-12(p40)             | 0.0065<br>(0.0000-0.0324)    | 0.0693<br>(0.0088-0.2145)       | 0.0801<br>(0.0000-0.1464)        | 0.0342<br>(0.0141-0.0713)       |            |            |                       |
|                                                                        | Rantes                 | 0.0188<br>(0.0000-0.0373)    | 1.4881*<br>(0.4954-1.9930)      | 1.2797<br>(0.4053-2.1539)        | 0.3402<br>(0.2881-0.5208)       |            |            |                       |
|                                                                        | IL-15                  | 0.7654<br>(0.4542-0.9879)    | 0.5073<br>(0.2194-0.8512)       | 1.1964<br>(0.0000-2.1386)        | 0.7485<br>(0.5604-1.1173)       |            |            |                       |
|                                                                        | IL-10                  | 0.1322<br>(0.0635-0.2418)    | 0.1755<br>(0.0726-0.3122)       | 0.304<br>(0.1719-0.4953)         | 0.3224<br>(0.1984-0.4373)       |            |            |                       |
| Growth Factor                                                          | VEGF                   | 0.0939<br>(0.0504-0.1242)    | 0.8789<br>(0.0840-1.4280)       | 0.7044<br>(0.3731-1.0589)        | 1.5284<br>(1.0060-2.4036)       |            |            |                       |
| Remaining Th1 and<br>Th2 cytokines                                     | IL-2                   | 0.3695<br>(0.1740-0.6000)    | 0.2807<br>(0.2042-0.4673)       | 0.7114<br>(0.3525-2.0768)        | 0.3137<br>(0.2695-0.5203)       |            |            |                       |
|                                                                        | IL-9                   | 2.8583<br>(1.2723-4.3150)    | 2.0577<br>(1.2930-2.8546)       | 5.4341<br>(1.9044-14.9804)       | 2.2019<br>(1.1574-2.6652)       |            |            |                       |
|                                                                        | IL-13                  | 0.0019<br>(0.0000-0.0094)    | 0.1588*<br>(0.0000-0.3500)      | 0.0258<br>(0.0000-0.1291)        | 0.0945<br>(0.0682-0.1356)       |            |            |                       |
| Other cytokines<br>(tissue injury,<br>infection, allergic<br>diseases) | IL-5                   | 0.0029<br>(0.0000-0.0145)    | 0.0151<br>(0.0026-0.0176)       | 0.0278<br>(0.0033-0.0625)        | 0.0603<br>(0.0188-0.1244)       | *          |            |                       |
|                                                                        | LIF                    | 0.0247<br>(0.0194-0.0333)    | 0.1672<br>(0.0888-0.2542)       | 0.2240<br>(0.0822-0.4214)        | 1.4260<br>(0.9997-2.0134)       | **         | **         | **                    |
|                                                                        | LIX                    | 0.0141<br>(0.0000-0.0707)    | 0.2613<br>(0.0000-0.8485)       | 1.7353<br>(0.0000-3.7464)        | 0.9390<br>(0.2325-3.1900)       |            |            |                       |
|                                                                        | MCP-1                  | 0.1763                       | 6.5930**                        | 6.2802**                         | 5.7833                          | **         |            |                       |

|                                                                            |         |                           |                              |                                |                             |    |    |
|----------------------------------------------------------------------------|---------|---------------------------|------------------------------|--------------------------------|-----------------------------|----|----|
|                                                                            |         | (0.0972-0.2994)           | (3.7755-10.3710)             | (2.4292-10.9643)               | (4.5943-7.4064)             |    |    |
|                                                                            | MIP-1a  | 0.6297<br>(0.3223-0.8892) | 6.1064<br>(2.2334-8.6202)    | 10.1674<br>(2.6456-14.9219)    | 19.877<br>(10.5216-42.7847) | *  |    |
|                                                                            | MIP-1b  | 0.1724<br>(0.0000-0.4046) | 2.5765<br>(1.2222-4.7883)    | 4.0204<br>(1.1225-6.4906)      | 6.7130<br>(4.3510-13.0127)  | ** |    |
|                                                                            | MIG     | 2.7518<br>(1.1075-4.3453) | 30.4542*<br>(6.5758-49.6708) | 44.9457**<br>(26.6448-59.7023) | 7.3863<br>(2.0267-9.3277)   |    | ** |
|                                                                            | IP-10   | 0.058<br>(0.0283-0.0879)  | 1.1581<br>(0.2423-2.9123)    | 1.7927*<br>(0.5939-3.8250)     | 0.6901<br>(0.5343-0.8172)   |    |    |
| Other cytokines<br>(immune cell<br>development, virus<br>infection, aging) | Eotaxin | 0.4300<br>(0.2158-0.7535) | 5.9608*<br>(3.3142-9.7373)   | 4.7119<br>(1.2508-6.6821)      | 5.7658*<br>(2.1140-9.3413)  |    |    |
|                                                                            | IL-3    | 0.0092<br>(0.0000-0.0458) | 0.0731<br>(0.0496-0.1003)    | 0.1553<br>(0.0854-0.2589)      | 0.1225<br>(0.0426-0.2510)   |    |    |
|                                                                            | IL-7    | 0.1688<br>(0.0000-0.3013) | 0.1278<br>(0.0000-0.2479)    | 0.4066<br>(0.1032-1.1554)      | 0.2674<br>(0.1374-0.5000)   |    |    |

Note: Con., mean concentration (pg/mg) and range (minimal-maximum); P value: \*\* $P < 0.01$ ; \* $P < 0.05$ ; vs. saline: compared with saline control group; vs. USA400: compared with USA400-CMRSA-7 group; vs. M92: compared with M92 group.

**Supplementary Table 3.** Cytokine and Chemokine profiles for mice on days 15 post infection with M92, USA400 and USA300 MRSA strains.

| Role                                                             | Cytokine/<br>Chemokine | Saline conc.                 | M92<br>conc.                 | USA400-<br>CMRSA7<br>conc.  | USA300-C2406                |            |            |                       |
|------------------------------------------------------------------|------------------------|------------------------------|------------------------------|-----------------------------|-----------------------------|------------|------------|-----------------------|
|                                                                  |                        |                              |                              |                             | USA300-<br>C2406 conc.      | vs. Saline | vs.<br>M92 | vs. USA400-<br>CMRSA7 |
| Protection                                                       | IL-17A                 | 0.0090<br>(0.0029-0.0212)    | 1.0281<br>(0.0000-3.3931)    | 0.1857<br>(0.0107-0.5135)   | 0.0735<br>(0.0045-0.2346)   |            |            |                       |
|                                                                  | IL-1a                  | 29.4422<br>(22.6123-39.1998) | 27.7803<br>(20.5775-34.5938) | 22.9545<br>(8.4360-33.7729) | 13.6385<br>(6.0992-29.4676) |            |            |                       |
|                                                                  | IL-1b                  | 0.3546<br>(0.2725-0.5471)    | 2.5540<br>(0.2000-7.6919)    | 0.8182<br>(0.5510-1.2965)   | 0.3609<br>(0.2563-0.1788)   |            |            |                       |
| Severity                                                         | IL-4                   | 0.0113<br>(0.0046-0.0192)    | 0.0143<br>(0.0061-0.0144)    | 0.0170<br>(0.0076-0.0263)   | 0.0108<br>(0.0100-0.0115)   |            |            |                       |
|                                                                  | IL-6                   | 0.0152<br>(0.0087-0.0216)    | 0.0896<br>(0.0184-0.1975)    | 1.4700<br>(0.0607-5.5447)   | 0.1444<br>(0.0307-0.4224)   |            |            |                       |
|                                                                  | IFN $\gamma$           | 0.0000<br>(0.0000-0.0000)    | 0.0666<br>(0.0000-0.2663)    | 0.0332<br>(0.0000-0.1329)   | 0.0000<br>(0.0000-0.0000)   |            |            |                       |
|                                                                  | TNFa                   | 0.0421<br>(0.0233-0.0580)    | 0.3565<br>(0.0486-0.7644)    | 0.2022<br>(0.1102-0.2792)   | 0.0928<br>(0.0716-0.1364)   |            |            |                       |
|                                                                  | GM-CSF                 | 0.2183<br>(0.0000-0.8731)    | 0.5481<br>(0.0688-1.2781)    | 0.5328<br>(0.0000-0.9740)   | 0.4241<br>(0.1738-0.6341)   |            |            |                       |
|                                                                  | G-CSF                  | 0.0205<br>(0.0000-0.0231)    | 0.6450<br>(0.0000-2.2750)    | 1.1249<br>(0.0362-2.9980)   | 1.4913<br>(0.0637-5.0381)   |            |            |                       |
|                                                                  | M-CSF                  | 0.0395<br>(0.0250-0.0708)    | 0.1489*<br>(0.0461-0.2163)   | 0.0981<br>(0.0417-0.1553)   | 0.1041<br>(0.0626-0.1506)   |            |            |                       |
|                                                                  | KC                     | 1.1661<br>(0.9109-1.6779)    | 6.7590<br>(1.0127-18.1375)   | 5.7285<br>(1.7078-11.9637)  | 1.6732<br>(0.6454-2.8646)   |            |            |                       |
|                                                                  | MIP-2                  | 0.4294<br>(0.3077-0.5814)    | 4.9329<br>(0.8691-14.2294)   | 8.9785<br>(0.5083-22.1577)  | 1.2638<br>(0.3497-2.2843)   |            |            |                       |
|                                                                  | IL-12(p70)             | 0.044<br>(0.0356-0.0525)     | 0.1478<br>(0.0598-0.2756)    | 0.0870<br>(0.0486-0.1444)   | 0.1031<br>(0.0565-0.1548)   |            |            |                       |
|                                                                  | IL-12(p40)             | 0.0073<br>(0.0000-0.0125)    | 0.0198<br>(0.0000-0.0430)    | 0.0098<br>(0.0000-0.0390)   | 0.0005<br>(0.0000-0.0023)   |            |            |                       |
|                                                                  | Rantes                 | 0.0101<br>(0.0000-0.0404)    | 13.1815<br>(0.0505-45.1938)  | 1.6185<br>(0.3200-3.0024)   | 0.4126<br>(0.0887-1.1489)   |            |            |                       |
|                                                                  | IL-15                  | 0.8604<br>(0.6116-1.4154)    | 1.6896<br>(0.5209-2.0494)    | 1.0279<br>(0.4502-1.9673)   | 0.4760<br>(0.1556-0.8995)   |            |            | *                     |
|                                                                  | IL-10                  | 0.1416<br>(0.0558-0.2984)    | 0.2258<br>(0.0693-0.3869)    | 0.0738<br>(0.0000-0.2097)   | 0.0894<br>(0.0237-0.1571)   |            |            |                       |
| Growth Factor                                                    | VEGF                   | 0.0481<br>(0.0216-0.0696)    | 0.6309<br>(0.0761-1.7319)    | 0.3147<br>(0.0510-0.4547)   | 0.2878<br>(0.0280-0.8604)   |            |            |                       |
| Remaining Th1 and Th2<br>cytokines                               | IL-2                   | 0.3407<br>(0.2680-0.5141)    | 0.5277<br>(0.3391-0.5763)    | 0.4925<br>(0.2278-0.9776)   | 0.2682<br>(0.0497-0.6425)   |            |            |                       |
|                                                                  | IL-9                   | 2.149<br>(1.6946-3.0917)     | 4.6561<br>(2.2207-6.0481)    | 3.505<br>(2.2521-5.3816)    | 1.9686<br>(1.0104-3.6475)   |            |            | *                     |
|                                                                  | IL-13                  | 0.000<br>(0.0000-0.0000)     | 0.0075<br>(0.0000-0.0300)    | 0.0814<br>(0.0000-0.2981)   | 0.0000<br>(0.0000-0.0000)   |            |            |                       |
| Other cytokines (tissue injury,<br>infection, allergic diseases) | IL-5                   | 0.0124<br>(0.0000-0.0284)    | 0.0147<br>(0.0050-0.0245)    | 0.0403<br>(0.0212-0.0796)   | 0.0227<br>(0.0186-0.02448)  |            |            |                       |
|                                                                  | LIF                    | 0.0278<br>(0.0104-0.0587)    | 0.2737<br>(0.0230-0.6988)    | 0.1521<br>(0.0795-0.1248)   | 0.1222<br>(0.1057-0.1329)   |            |            |                       |
|                                                                  | LIX                    | 0.0000<br>(0.0000-0.0000)    | 0.0370<br>(0.0000-0.1481)    | 0.0000<br>(0.0000-0.0000)   | 0.0000<br>(0.0000-0.0000)   |            |            |                       |
|                                                                  | MCP-1                  | 0.2798<br>(0.2110-0.3102)    | 7.8279<br>(0.3741-25.9475)   | 2.3032<br>(1.6291-3.0486)   | 1.9772<br>(1.2228-2.3272)   |            |            |                       |

|                                                                         |         |                           |                               |                             |                             |   |
|-------------------------------------------------------------------------|---------|---------------------------|-------------------------------|-----------------------------|-----------------------------|---|
|                                                                         | MIP-1a  | 0.3600<br>(0.2896-0.4827) | 2.4247<br>(0.6000-6.2544)     | 0.9225<br>(0.2205-1.4191)   | 0.3675<br>(0.1697-0.9529)   |   |
|                                                                         | MIP-1b  | 0.0659<br>(0.0000-0.2637) | 1.4033<br>(0.0000-3.8269)     | 0.7749<br>(0.3169-1.0397)   | 0.3043<br>(0.2222-0.5454)   |   |
|                                                                         | MIG     | 2.1910<br>(0.9971-4.7288) | 69.3482*<br>(3.0230-132.9413) | 22.5006<br>(2.7523-36.8708) | 12.3011<br>(0.5971-38.7418) | * |
| Other cytokines (immune cell<br>development, virus infection,<br>aging) | IP-10   | 0.0493<br>(0.0311-0.0673) | 1.3861<br>(0.0500-4.0469)     | 0.3682<br>(0.1093-0.5528)   | 0.2124<br>(0.0465-0.5418)   |   |
|                                                                         | Eotaxin | 0.2368<br>(0.2038-0.2827) | 2.5170<br>(0.3016-5.7044)     | 0.7363<br>(0.6500-0.9188)   | 1.1944<br>(0.6307-3.2329)   |   |
|                                                                         | IL-3    | 0.0033<br>(0.0000-0.0032) | 0.0506<br>(0.0250-0.0975)     | 0.0314<br>(0.0000-0.0796)   | 0.0531<br>(0.0288-0.1271)   |   |
|                                                                         | IL-7    | 0.0493<br>(0.0000-0.0981) | 0.2192<br>(0.0000-0.4519)     | 0.2090<br>(0.1067-0.2533)   | 0.1509<br>(0.0892-0.1681)   |   |

Note: Con., mean concentration (pg/mg) and range (minimal-maximum); P value: \*\*P<0.01; \*P <0.05; vs. saline: compared with saline control group; vs. USA400: compared with USA400-CMRSA-7 group; vs. M92: compared with M92 group.
